# Supplementary material for: Circulating Y-RNAs, a predicted function controlling the Immune System, Cell Signaling, and DNA Replication in Pediatric Patients with Pilocytic and Diffuse Astrocytoma
Source: Research Square preprint supplement (doi:10.21203/rs.3.rs-1462683/v1), 2022-03-29
Supplement: Supplementary file 1 [file 7618d2a2c4140e8fd4fa481e.docx]

| Additional file6.  RNY-1 VERSUS ORC RELATED PROTEINS  (RANDOM FOREST AND SUPPORT VECTOR MACHINE) | | |
| --- | --- | --- |
| Protein | RF | SVM |
| XP_024302234.1 DNA polymerase eta isoform X2 | 0.8 | 0.887 |
| NP_060386.1 PIH1 domain-containing protein 1 | 0.8 | 0.606 |
| NP_001030598.1 general transcription factor 3C polypeptide 2 isoform b | 0.8 | 0.901 |
| NP_006804.1 proline-rich nuclear receptor coactivator 1 | 0.8 | 0.88 |
| XP_011537958.1 DNA polymerase lambda isoform X6 | 0.75 | 0.689 |
| XP_016871575.1 DNA polymerase lambda isoform X10 | 0.75 | 0.665 |
| NP_647603.1 TATA box-binding protein-associated factor RNA polymerase I subunit A isoform 2 | 0.75 | 0.787 |
| NP_000391.1 general transcription and DNA repair factor IIH helicase subunit XPD isoform 1 | 0.75 | 0.787 |
| NP_569079.1 ATPase WRNIP1 isoform 2 | 0.75 | 0.756 |
| NP_001305838.1 general transcription factor 3C polypeptide 2 isoform a | 0.75 | 0.92 |
| NP_001276898.1 serine/threonine-protein phosphatase 2B catalytic subunit beta isoform isoform e | 0.75 | 0.802 |
| NP_001265720.1 replication factor C subunit 2 isoform 3 | 0.75 | 0.769 |
| NP_001276913.1 E3 ubiquitin-protein ligase Jade-2 isoform 1 | 0.75 | 0.821 |
| NP_001165289.1 peroxisome proliferator-activated receptor delta isoform 1 | 0.75 | 0.774 |
| NP_001287893.1 cyclin-dependent kinase 19 isoform 3 | 0.75 | 0.877 |
| XP_024307541.1 membralin isoform X6 | 0.75 | 0.78 |
| NP_001287888.1 zinc finger MIZ domain-containing protein 2 isoform 3 | 0.75 | 0.738 |
| XP_016884452.1 synapsin-3 isoform X1 | 0.75 | 0.926 |
| NP_001167556.1 DNA polymerase lambda isoform b | 0.7 | 0.665 |
| NP_057302.1 DNA polymerase kappa isoform 1 | 0.7 | 0.928 |
| XP_016865048.1 DNA polymerase kappa isoform X2 | 0.7 | 0.928 |
| XP_011541766.1 DNA polymerase kappa isoform X1 | 0.7 | 0.934 |
| XP_005249243.1 DNA polymerase eta isoform X1 | 0.7 | 0.874 |
| XP_024303713.1 DNA polymerase lambda isoform X17 | 0.7 | 0.68 |
| XP_011537957.1 DNA polymerase lambda isoform X4 | 0.7 | 0.665 |
| XP_011537956.1 DNA polymerase lambda isoform X3 | 0.7 | 0.67 |
| NP_056399.1 polymerase delta-interacting protein 2 isoform 1 | 0.7 | 0.735 |
| NP_001277074.1 polymerase delta-interacting protein 2 isoform 2 | 0.7 | 0.719 |
| NP_001269708.1 DNA-directed RNA polymerase I subunit RPA2 isoform 6 | 0.7 | 0.888 |
| NP_075045.2 poly(A) polymerase gamma | 0.7 | 0.92 |
| XP_006721959.1 DNA ligase 3 isoform X3 | 0.7 | 0.847 |
| NP_115479.4 lethal(3)malignant brain tumor-like protein 1 isoform II | 0.7 | 0.879 |
| NP_001304863.1 UV-stimulated scaffold protein A | 0.7 | 0.834 |
| NP_001288612.1 ATP-dependent RNA helicase SUPV3L1, mitochondrial isoform 2 | 0.7 | 0.886 |
| NP_620710.2 SWI/SNF-related matrix-associated actin-dependent regulator of chromatin subfamily D member 1 isoform b | 0.7 | 0.783 |
| NP_009197.3 GPN-loop GTPase 1 isoform a | 0.7 | 0.821 |
| NP_003162.2 ATP-dependent RNA helicase SUPV3L1, mitochondrial isoform 1 | 0.7 | 0.913 |
| NP_001335282.1 transcription initiation factor IIE subunit beta isoform 2 | 0.7 | 0.874 |
| NP_002088.2 transcription factor IIIA | 0.7 | 0.942 |
| NP_001292997.1 double homeobox protein 4 isoform DUX4-fl | 0.7 | 0.7 |
| NP_001245280.2 granzyme M isoform 2 | 0.7 | 0.614 |
| NP_620061.2 phosphoglycerate kinase 2 | 0.7 | 0.507 |
| NP_057059.2 transcription initiation factor TFIID subunit 9B | 0.7 | 0.812 |
| NP_001165290.1 peroxisome proliferator-activated receptor delta isoform 3 | 0.7 | 0.831 |
| NP_079151.2 synaptopodin 2-like protein isoform b | 0.7 | 0.895 |
| NP_001272829.1 GRINL1A combined protein isoform 3 | 0.7 | 0.916 |
| NP_004506.2 interleukin enhancer-binding factor 2 isoform 1 | 0.7 | 0.806 |
| NP_055403.2 visual system homeobox 1 isoform a | 0.7 | 0.756 |
| NP_036311.3 F-box only protein 7 isoform 1 | 0.7 | 0.794 |
| NP_004809.2 probable ATP-dependent RNA helicase DDX23 | 0.7 | 0.788 |
| NP_001028196.1 F-box only protein 7 isoform 2 | 0.7 | 0.75 |
| NP_001245260.1 band 4.1-like protein 1 isoform b | 0.7 | 0.925 |
| NP_818932.1 band 4.1-like protein 1 isoform b | 0.7 | 0.925 |
| NP_612144.1 E3 ubiquitin-protein ligase DTX3L | 0.7 | 0.874 |
| XP_024302209.1 ras-related protein Rab-44 isoform X6 | 0.7 | 0.832 |
| XP_024301775.1 E3 ubiquitin-protein ligase Jade-2 isoform X3 | 0.7 | 0.812 |
| XP_024309066.1 nucleoside diphosphate kinase 6 isoform X2 | 0.7 | 0.815 |
| XP_024306104.1 rho GTPase-activating protein 17 isoform X7 | 0.7 | 0.822 |
| XP_016873137.2 leucine zipper protein 2 isoform X2 | 0.7 | 0.826 |
| NP_001337032.1 arf-GAP with GTPase, ANK repeat and PH domain-containing protein 3 isoform g | 0.7 | 0.914 |
| XP_011527235.1 zinc finger protein 512B isoform X7 | 0.7 | 0.561 |
| XP_005270216.1 synaptopodin 2-like protein isoform X1 | 0.7 | 0.897 |
| NP_001167555.1 DNA polymerase lambda isoform a | 0.65 | 0.667 |
| NP_037406.1 DNA polymerase lambda isoform a | 0.65 | 0.667 |
| NP_009146.2 DNA polymerase subunit gamma-2, mitochondrial | 0.65 | 0.94 |
| NP_001184259.1 DNA polymerase epsilon subunit 2 isoform 2 | 0.65 | 0.773 |
| NP_006493.1 DNA polymerase eta isoform 1 | 0.65 | 0.89 |
| NP_006582.1 DNA polymerase delta subunit 3 isoform 1 | 0.65 | 0.915 |
| NP_002680.2 DNA polymerase alpha subunit B | 0.65 | 0.877 |
| NP_001278898.1 DNA polymerase eta isoform 2 | 0.65 | 0.874 |
| NP_001332851.1 DNA polymerase kappa isoform 3 | 0.65 | 0.935 |
| XP_016865052.1 DNA polymerase kappa isoform X5 | 0.65 | 0.935 |
| XP_011541769.1 DNA polymerase kappa isoform X4 | 0.65 | 0.938 |
| XP_011537953.1 DNA polymerase lambda isoform X2 | 0.65 | 0.667 |
| XP_024302235.1 DNA polymerase eta isoform X4 | 0.65 | 0.833 |
| XP_011513000.1 DNA polymerase eta isoform X3 | 0.65 | 0.874 |
| XP_024303712.1 DNA polymerase lambda isoform X16 | 0.65 | 0.688 |
| XP_016869073.1 DNA polymerase beta isoform X5 | 0.65 | 0.783 |
| XP_016871574.1 DNA polymerase lambda isoform X7 | 0.65 | 0.677 |
| XP_016871573.1 DNA polymerase lambda isoform X5 | 0.65 | 0.686 |
| NP_002302.2 DNA ligase 3 isoform beta precursor | 0.65 | 0.843 |
| NP_060579.3 poly(A) RNA polymerase, mitochondrial precursor | 0.65 | 0.851 |
| NP_001307822.1 DNA (cytosine-5)-methyltransferase 3A isoform d | 0.65 | 0.859 |
| NP_001269705.1 DNA-directed RNA polymerase I subunit RPA2 isoform 5 | 0.65 | 0.88 |
| NP_001269703.1 DNA-directed RNA polymerase I subunit RPA2 isoform 4 | 0.65 | 0.86 |
| NP_001713.2 DNA-directed RNA polymerase III subunit RPC4 | 0.65 | 0.752 |
| NP_005672.1 TATA box-binding protein-associated factor RNA polymerase I subunit A isoform 1 | 0.65 | 0.884 |
| NP_001244964.1 DNA-directed RNA polymerase III subunit RPC5 isoform 3 | 0.65 | 0.895 |
| NP_060897.3 RNA polymerase I-specific transcription initiation factor RRN3 isoform 1 | 0.65 | 0.92 |
| NP_001287993.1 RNA polymerase I-specific transcription initiation factor RRN3 isoform 2 | 0.65 | 0.936 |
| NP_006288.2 DNA repair protein XRCC1 | 0.65 | 0.766 |
| NP_001353298.1 DNA replication licensing factor MCM3 isoform 3 | 0.65 | 0.899 |
| NP_001124339.1 general transcription and DNA repair factor IIH helicase subunit XPD isoform 2 | 0.65 | 0.688 |
| NP_006464.1 TAF6-like RNA polymerase II p300/CBP-associated factor-associated factor 65 kDa subunit 6L | 0.65 | 0.796 |
| NP_004822.2 mediator of RNA polymerase II transcription subunit 26 | 0.65 | 0.813 |
| NP_001257558.1 mediator of RNA polymerase II transcription subunit 4 isoform 2 | 0.65 | 0.719 |
| NP_002686.2 DNA-directed RNA polymerases I, II, and III subunit RPABC1 isoform a | 0.65 | 0.68 |
| NP_060780.2 transcription factor IIIB 50 kDa subunit | 0.65 | 0.812 |
| NP_008930.2 terminal nucleotidyltransferase 4A isoform 1 | 0.65 | 0.861 |
| NP_001165276.2 terminal nucleotidyltransferase 4A isoform 2 | 0.65 | 0.86 |
| NP_064520.2 ATPase WRNIP1 isoform 1 | 0.65 | 0.747 |
| NP_055953.3 RNA polymerase-associated protein RTF1 homolog | 0.65 | 0.851 |
| NP_064446.2 SLC2A4 regulator | 0.65 | 0.684 |
| NP_001243020.1 cyclic AMP-dependent transcription factor ATF-2 isoform 2 | 0.65 | 0.879 |
| NP_001295114.1 cyclin-L1 isoform 2 | 0.65 | 0.911 |
| NP_037534.5 acyl-CoA (8-3)-desaturase | 0.65 | 0.717 |
| NP_001135825.1 serine/threonine-protein phosphatase 2B catalytic subunit beta isoform isoform a | 0.65 | 0.782 |
| NP_001252.1 cyclin-dependent kinase 9 | 0.65 | 0.755 |
| NP_001135826.1 serine/threonine-protein phosphatase 2B catalytic subunit beta isoform isoform c | 0.65 | 0.772 |
| NP_001265721.1 replication factor C subunit 2 isoform 4 | 0.65 | 0.796 |
| NP_002905.2 replication factor C subunit 2 isoform 2 | 0.65 | 0.709 |
| NP_001299582.1 histone H2B type 1-K | 0.65 | 0.711 |
| NP_803184.1 peroxisome proliferator-activated receptor delta isoform 2 | 0.65 | 0.697 |
| NP_542160.1 histone H2B type 1-K | 0.65 | 0.711 |
| NP_689487.2 cyclin-Q isoform 1 | 0.65 | 0.661 |
| NP_001121168.1 ataxin-3 isoform ad | 0.65 | 0.775 |
| NP_001341968.1 histone deacetylase 3 isoform 1 | 0.65 | 0.706 |
| NP_078956.2 transcription factor E2F8 | 0.65 | 0.861 |
| NP_001019770.1 histone H2B type 2-F isoform a | 0.65 | 0.709 |
| NP_996737.1 protein quaking isoform 4 | 0.65 | 0.809 |
| NP_001186747.1 G-protein coupled receptor-associated sorting protein 2 Gprasp2 | 0.65 | 0.915 |
| NP_001269160.1 armadillo repeat-containing X-linked protein 2 | 0.65 | 0.489 |
| NP_996736.1 protein quaking isoform 3 | 0.65 | 0.817 |
| NP_996735.1 protein quaking isoform 2 | 0.65 | 0.816 |
| NP_056249.1 integrator complex subunit 7 isoform 1 | 0.65 | 0.885 |
| NP_001186740.1 integrator complex subunit 7 isoform 2 | 0.65 | 0.878 |
| NP_037465.2 epsin-1 isoform c | 0.65 | 0.713 |
| NP_001333042.2 folliculin-interacting protein 1 isoform 3 | 0.65 | 0.895 |
| NP_001310999.1 cyclin-dependent kinase 7 isoform 3 | 0.65 | 0.856 |
| NP_001311007.1 cyclin-dependent kinase 7 isoform 4 | 0.65 | 0.783 |
| XP_024308252.1 armadillo repeat-containing X-linked protein 2 isoform X1 | 0.65 | 0.489 |
| XP_024302208.1 ras-related protein Rab-44 isoform X5 | 0.65 | 0.808 |
| XP_024302206.1 ras-related protein Rab-44 isoform X3 | 0.65 | 0.849 |
| XP_024306737.1 ras-related protein Rab-34 isoform X2 | 0.65 | 0.716 |
| XP_024306717.1 acyl-CoA-binding domain-containing protein 4 isoform X5 | 0.65 | 0.741 |
| XP_016879023.1 chromosome transmission fidelity protein 18 homolog isoform X4 | 0.65 | 0.798 |
| XP_011529374.1 armadillo repeat-containing X-linked protein 2 isoform X1 | 0.65 | 0.489 |
| XP_011520493.1 protein regulator of cytokinesis 1 isoform X10 | 0.65 | 0.789 |
| XP_011520490.1 protein regulator of cytokinesis 1 isoform X2 | 0.65 | 0.859 |
| XP_011511688.1 transforming acidic coiled-coil-containing protein 3 isoform X3 | 0.65 | 0.875 |
| XP_006720822.1 protein regulator of cytokinesis 1 isoform X10 | 0.65 | 0.789 |
| XP_006713773.1 cyclin-L1 isoform X1 | 0.65 | 0.895 |
| NP_001338543.1 DNA polymerase iota isoform e | 0.6 | 0.957 |
| NP_001338539.1 DNA polymerase iota isoform b | 0.6 | 0.96 |
| NP_001338544.1 DNA polymerase iota isoform e | 0.6 | 0.957 |
| NP_002681.1 DNA polymerase beta | 0.6 | 0.797 |
| NP_001243808.1 DNA polymerase delta subunit 2 isoform 1 | 0.6 | 0.82 |
| NP_001335314.1 DNA polymerase epsilon subunit 2 isoform 5 | 0.6 | 0.794 |
| NP_001332850.1 DNA polymerase kappa isoform 2 | 0.6 | 0.938 |
| XP_011543180.1 DNA polymerase alpha subunit B isoform X3 | 0.6 | 0.863 |
| XP_011543179.1 DNA polymerase alpha subunit B isoform X1 | 0.6 | 0.844 |
| XP_011535144.1 DNA polymerase epsilon subunit 2 isoform X2 | 0.6 | 0.771 |
| XP_011537955.1 DNA polymerase lambda isoform X1 | 0.6 | 0.682 |
| XP_005273594.1 DNA polymerase beta isoform X3 | 0.6 | 0.787 |
| XP_024302570.1 DNA polymerase delta subunit 2 isoform X1 | 0.6 | 0.82 |
| XP_024306849.1 DNA polymerase iota isoform X1 | 0.6 | 0.957 |
| XP_024303711.1 DNA polymerase lambda isoform X9 | 0.6 | 0.643 |
| XP_024303710.1 DNA polymerase lambda isoform X8 | 0.6 | 0.662 |
| XP_016871582.1 DNA polymerase lambda isoform X20 | 0.6 | 0.637 |
| XP_016871576.1 DNA polymerase lambda isoform X11 | 0.6 | 0.673 |
| NP_001271259.1 DNA-directed DNA/RNA polymerase mu isoform 2 | 0.6 | 0.762 |
| NP_002687.1 DNA-directed RNA polymerase II subunit RPB7 | 0.6 | 0.491 |
| NP_001308387.1 DNA repair protein REV1 isoform 5 | 0.6 | 0.876 |
| NP_001244963.1 DNA-directed RNA polymerase III subunit RPC5 isoform 4 | 0.6 | 0.889 |
| NP_000098.1 DNA damage-binding protein 2 isoform WT | 0.6 | 0.905 |
| NP_002379.4 DNA replication licensing factor MCM3 isoform 1 | 0.6 | 0.877 |
| NP_001353303.1 DNA replication licensing factor MCM3 isoform 8 | 0.6 | 0.845 |
| NP_001353302.1 DNA replication licensing factor MCM3 isoform 7 | 0.6 | 0.79 |
| NP_001353300.1 DNA replication licensing factor MCM3 isoform 5 | 0.6 | 0.905 |
| NP_001353301.1 DNA replication licensing factor MCM3 isoform 6 | 0.6 | 0.873 |
| NP_001257401.2 DNA replication licensing factor MCM3 isoform 2 | 0.6 | 0.853 |
| NP_001280561.1 poly(A) polymerase alpha isoform 5 | 0.6 | 0.851 |
| NP_079089.2 putative RNA polymerase II subunit B1 CTD phosphatase RPAP2 | 0.6 | 0.878 |
| NP_000073.1 DNA excision repair protein ERCC-8 isoform 1 | 0.6 | 0.863 |
| NP_001017520.1 DNA nucleotidylexotransferase isoform 2 | 0.6 | 0.882 |
| NP_004079.3 DNA nucleotidylexotransferase isoform 1 | 0.6 | 0.885 |
| NP_001277214.1 DNA excision repair protein ERCC-8 isoform 4 | 0.6 | 0.788 |
| NP_078880.2 RNA polymerase II-associated protein 3 isoform 1 | 0.6 | 0.838 |
| NP_001119602.1 DNA replication complex GINS protein PSF3 isoform c | 0.6 | 0.672 |
| NP_001119601.1 DNA replication complex GINS protein PSF3 isoform a | 0.6 | 0.722 |
| NP_054885.1 mediator of RNA polymerase II transcription subunit 4 isoform 1 | 0.6 | 0.67 |
| NP_004259.3 mediator of RNA polymerase II transcription subunit 17 | 0.6 | 0.871 |
| NP_001304699.2 mediator of RNA polymerase II transcription subunit 29 isoform 2 | 0.6 | 0.768 |
| XP_016859803.1 DNA repair protein REV1 isoform X5 | 0.6 | 0.876 |
| NP_002936.1 replication protein A 70 kDa DNA-binding subunit isoform 1 | 0.6 | 0.897 |
| NP_853551.1 replication factor C subunit 4 | 0.6 | 0.7 |
| NP_001139575.1 protein mono-ADP-ribosyltransferase PARP9 isoform b | 0.6 | 0.855 |
| NP_113646.2 protein mono-ADP-ribosyltransferase PARP9 isoform a | 0.6 | 0.843 |
| NP_001307893.1 testis-specific Y-encoded protein 1 isoform 3 | 0.6 | 0.81 |
| NP_001138521.1 GPN-loop GTPase 1 isoform d | 0.6 | 0.802 |
| NP_001310516.1 ATP-dependent RNA helicase SUPV3L1, mitochondrial isoform 4 | 0.6 | 0.844 |
| NP_001139576.1 protein mono-ADP-ribosyltransferase PARP9 isoform b | 0.6 | 0.855 |
| NP_001139574.1 protein mono-ADP-ribosyltransferase PARP9 isoform a | 0.6 | 0.843 |
| NP_064703.1 cyclin-L1 isoform 1 | 0.6 | 0.828 |
| NP_003178.1 transcription initiation factor TFIID subunit 9 | 0.6 | 0.797 |
| NP_001264771.1 cyclin-T1 isoform b | 0.6 | 0.729 |
| NP_066955.1 serine/threonine-protein phosphatase 2B catalytic subunit beta isoform isoform b | 0.6 | 0.769 |
| NP_001129495.1 transcription factor NF-E2 45 kDa subunit | 0.6 | 0.789 |
| NP_006747.1 transcription elongation factor A protein 1 isoform 1 | 0.6 | 0.812 |
| NP_542432.2 three prime repair exonuclease 2 | 0.6 | 0.622 |
| NP_001276897.1 serine/threonine-protein phosphatase 2B catalytic subunit beta isoform isoform d | 0.6 | 0.759 |
| NP_001361440.1 cyclin-dependent kinase inhibitor 1 isoform 4 | 0.6 | 0.743 |
| NP_001356576.1 snRNA-activating protein complex subunit 3 isoform 2 | 0.6 | 0.652 |
| NP_005308.2 granzyme M isoform 1 preproprotein | 0.6 | 0.713 |
| NP_006332.3 mitotic spindle assembly checkpoint protein MAD2B | 0.6 | 0.725 |
| NP_055865.1 cap-specific mRNA (nucleoside-2'-O-)-methyltransferase 1 | 0.6 | 0.861 |
| NP_001232.1 cyclin-T2 isoform a | 0.6 | 0.882 |
| NP_001287847.1 high mobility group protein HMGI-C isoform c | 0.6 | 0.45 |
| NP_003874.2 histone deacetylase 3 isoform 2 | 0.6 | 0.686 |
| NP_004856.1 TATA box-binding protein-like protein 1 | 0.6 | 0.623 |
| NP_001353532.1 decreased expression in renal and prostate cancer protein isoform 1 | 0.6 | 0.607 |
| NP_005181.2 cyclin-C isoform a | 0.6 | 0.915 |
| NP_001350466.1 cyclin-C isoform c | 0.6 | 0.91 |
| NP_057104.2 dimethyladenosine transferase 1, mitochondrial isoform 1 | 0.6 | 0.672 |
| NP_001035026.1 integrator complex subunit 6 isoform b | 0.6 | 0.944 |
| NP_001351501.1 general transcription factor IIH subunit 2 isoform c | 0.6 | 0.943 |
| NP_001240605.1 TATA box-binding protein-like protein 1 | 0.6 | 0.623 |
| NP_001273451.1 protein mono-ADP-ribosyltransferase PARP11 isoform b | 0.6 | 0.808 |
| NP_001243502.1 neuronal acetylcholine receptor subunit alpha-4 isoform 2 | 0.6 | 0.601 |
| NP_001349720.1 eukaryotic translation initiation factor 3 subunit B isoform 1 | 0.6 | 0.863 |
| NP_065764.1 zinc finger protein 512B | 0.6 | 0.803 |
| NP_003742.2 eukaryotic translation initiation factor 3 subunit B isoform 1 | 0.6 | 0.863 |
| NP_003207.1 thyrotroph embryonic factor isoform 1 | 0.6 | 0.786 |
| NP_694967.3 beta-taxilin | 0.6 | 0.707 |
| NP_009116.3 CUGBP Elav-like family member 3 isoform 1 | 0.6 | 0.874 |
| NP_001198.2 transcription factor BTF3 isoform B | 0.6 | 0.816 |
| NP_001278036.1 CUGBP Elav-like family member 3 isoform 5 | 0.6 | 0.873 |
| NP_036350.2 interleukin enhancer-binding factor 3 isoform a | 0.6 | 0.799 |
| NP_001165582.1 sentrin-specific protease 8 | 0.6 | 0.611 |
| NP_060090.2 interleukin enhancer-binding factor 3 isoform d | 0.6 | 0.803 |
| NP_001034753.1 tumor necrosis factor receptor superfamily member 25 isoform 12 precursor | 0.6 | 0.444 |
| XP_011536274.1 cell cycle checkpoint control protein RAD9B isoform X2 | 0.6 | 0.831 |
| XP_016874369.1 cell cycle checkpoint control protein RAD9B isoform X6 | 0.6 | 0.783 |
| XP_011524833.1 proline and serine-rich protein 3 isoform X4 | 0.6 | 0.837 |
| XP_011524831.1 proline and serine-rich protein 3 isoform X2 | 0.6 | 0.863 |
| XP_011524830.1 proline and serine-rich protein 3 isoform X1 | 0.6 | 0.837 |
| XP_005247877.1 protein mono-ADP-ribosyl transferase PARP9 isoform X1 | 0.6 | 0.843 |
| NP_002477.1 nuclear cap-binding protein subunit 1 isoform 1 | 0.6 | 0.894 |
| XP_024302207.1 ras-related protein Rab-44 isoform X4 | 0.6 | 0.828 |
| XP_024302109.1 beta-taxilin isoform X1 | 0.6 | 0.707 |
| XP_024309699.1 DNA-directed primase/polymerase protein isoform X10 | 0.6 | 0.625 |
| XP_024307721.1 zinc finger protein 512B isoform X3 | 0.6 | 0.786 |
| XP_024307590.1 neuronal acetylcholine receptor subunit alpha-4 isoform X2 | 0.6 | 0.601 |
| XP_024307378.1 asc-type amino acid transporter 1 isoform X4 | 0.6 | 0.803 |
| XP_024306957.1 proline-rich proteoglycan 2 isoform X4 | 0.6 | 0.632 |
| XP_024306076.1 RNA binding protein fox-1 homolog 1 isoform X28 | 0.6 | 0.789 |
| XP_016873138.2 leucine zipper protein 2 isoform X3 | 0.6 | 0.91 |
| XP_024304184.1 EH domain-binding protein 1-like protein 1 isoform X9 | 0.6 | 0.712 |
| XP_011518043.2 transcription initiation factor TFIID subunit 3 isoform X1 | 0.6 | 0.807 |
| XP_016858059.1 proline/serine-rich coiled-coil protein 1 isoform X2 | 0.6 | 0.904 |
| XP_011520874.1 chromosome transmission fidelity protein 18 homolog isoform X1 | 0.6 | 0.825 |
| XP_011513902.1 eukaryotic translation initiation factor 3 subunit B isoform X1 | 0.6 | 0.863 |
| XP_011533807.1 beta-taxilin isoform X1 | 0.6 | 0.707 |
| XP_005271340.1 proline/serine-rich coiled-coil protein 1 isoform X2 | 0.6 | 0.904 |
| NP_001338435.1 nuclear cap-binding protein subunit 1 isoform 3 | 0.6 | 0.914 |
| NP_001357330.1 rab11 family-interacting protein 3 isoform 3 | 0.6 | 0.726 |
| NP_689911.2 APC membrane recruitment protein 3 | 0.6 | 0.849 |
| XP_024302798.1 uncharacterized protein LOC112267992 | 0.6 | 0.756 |
| XP_011529518.1 melatonin-related receptor isoform X1 | 0.6 | 0.73 |
| XP_011527232.1 zinc finger protein 512B isoform X4 | 0.6 | 0.782 |
| XP_011524834.1 proline and serine-rich protein 3 isoform X5 | 0.6 | 0.794 |
| XP_011509095.1 APC membrane recruitment protein 3 isoform X1 | 0.6 | 0.849 |
| XP_006720823.1 protein regulator of cytokinesis 1 isoform X11 | 0.6 | 0.796 |
| NP_001098663.1 APC membrane recruitment protein 3 | 0.6 | 0.849 |
